# Supplementary material for: Influence of Fat Replacers on the Rheological, Tribological, and Aroma Release Properties of Reduced-Fat Emulsions
Source: MDPI journal article supplement (doi:10.3390/foods11060820), 2022-03-12
Supplement: s1 [file s1]

Supplementary Materials

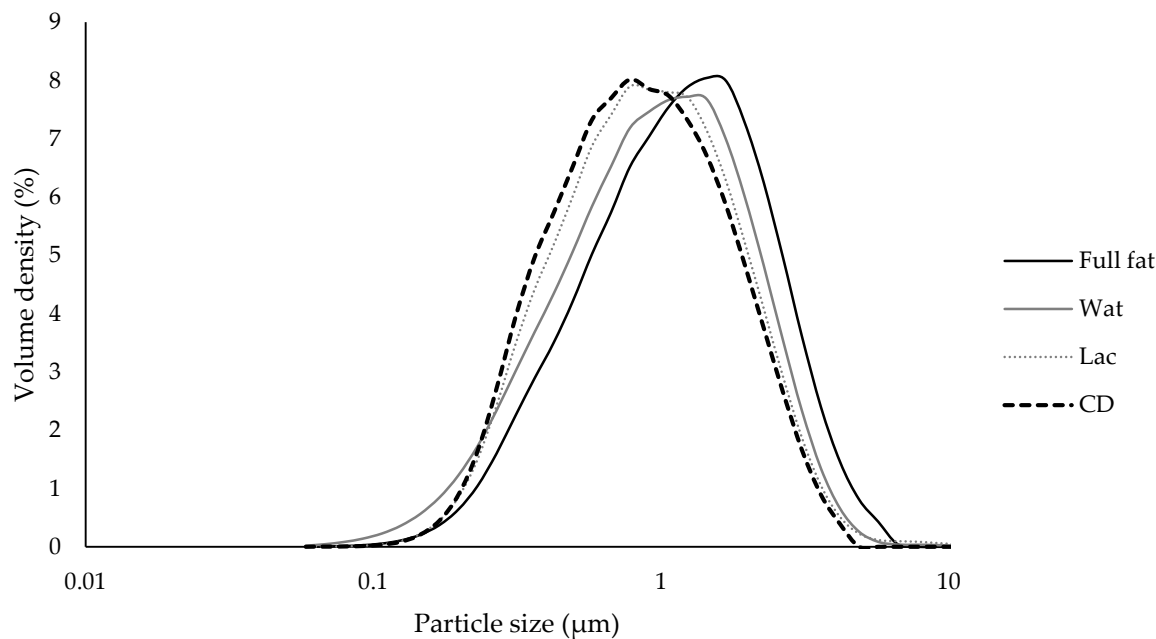

**Figure S1.** Particle size distribution of four single measurements as example curves for the particle size determination.

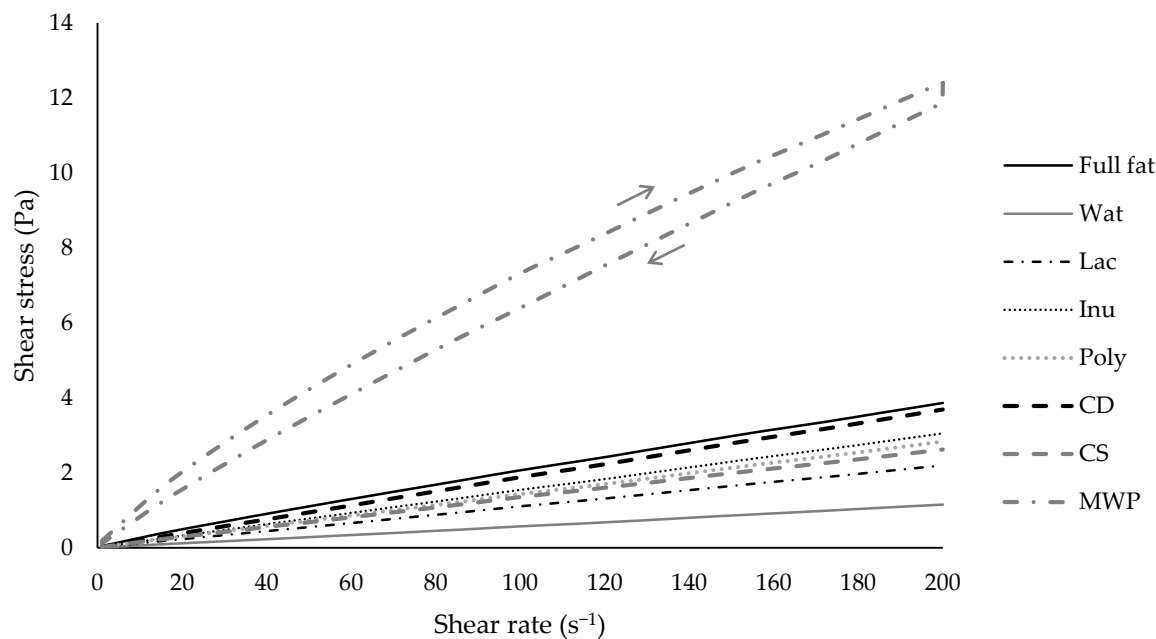

**Figure S2.** Flow curve diagram for single measurements of all emulsion formulations as example curves for rheological analysis (arrows indicate curve progression for MWP sample).

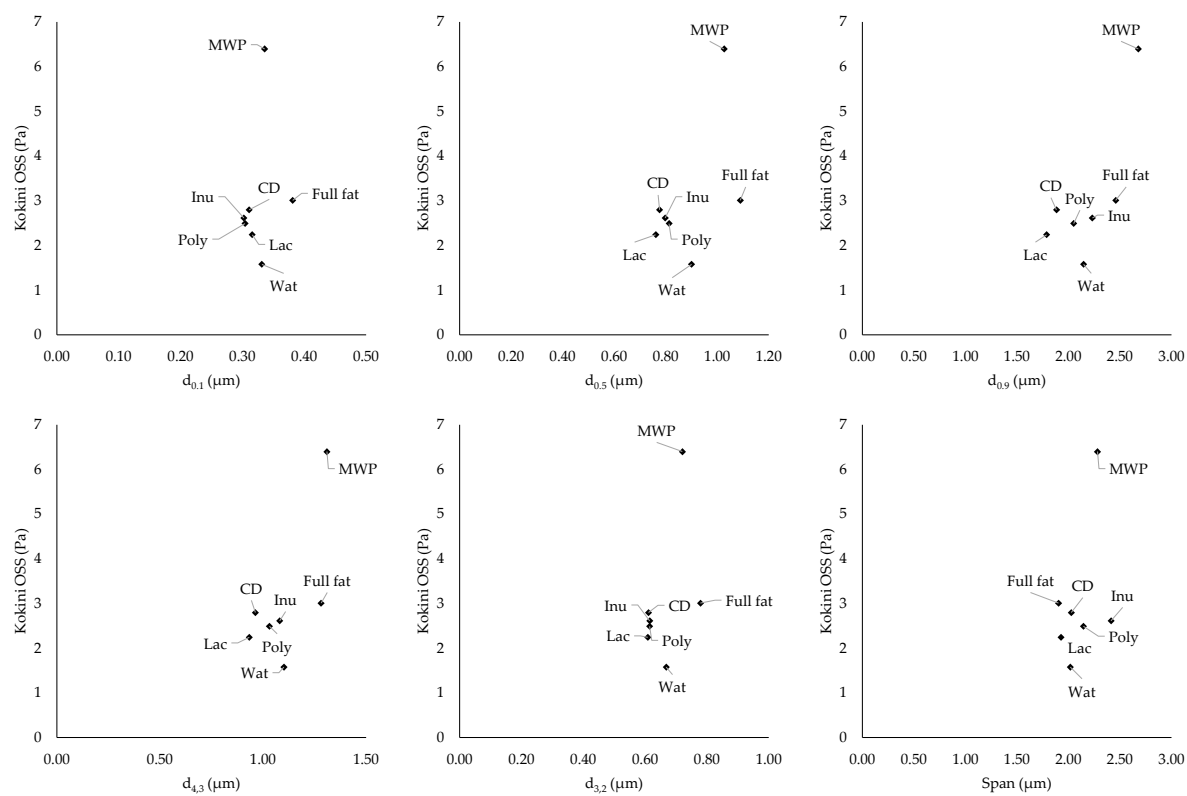

**Figure S3.** Characteristic numbers of the particle size distribution versus Kokini OSS of all emulsions.

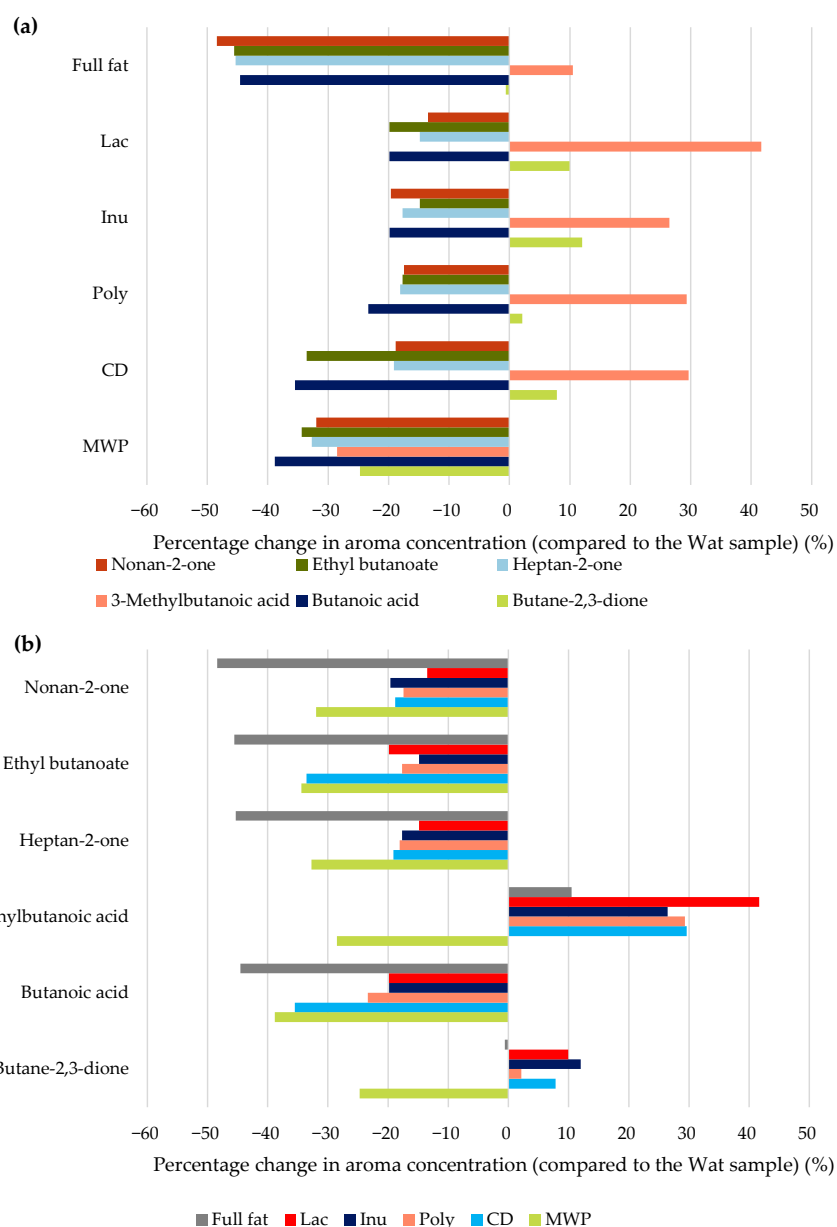

**Figure S4.** Percentage change in the headspace aroma concentration of all emulsion samples compared to the Wat sample, sorted by emulsion formulation **(a)** and by aroma compound **(b)**.

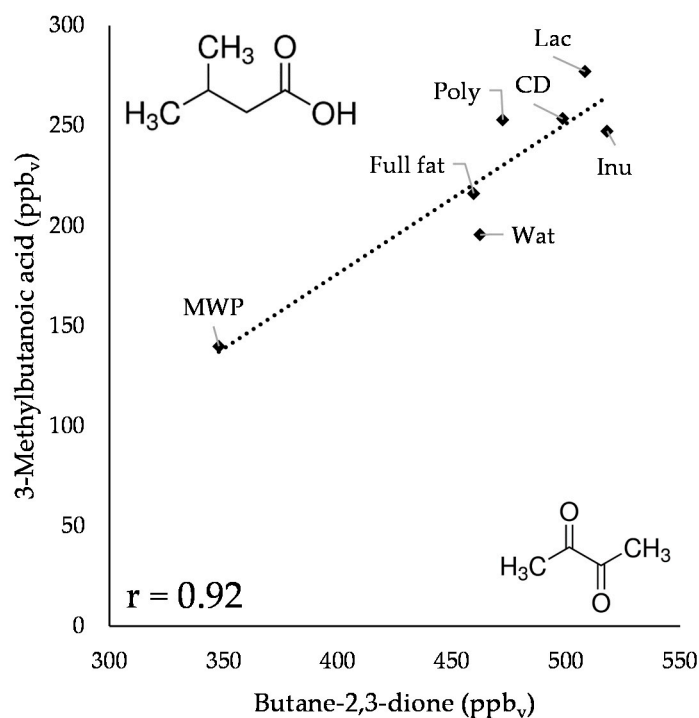

**Figure S5.** Correlation between the headspace concentrations of the aroma compounds butane-2,3-dione and 3-methylbutanoic acid in the different emulsions ( $r$  = correlation coefficient).

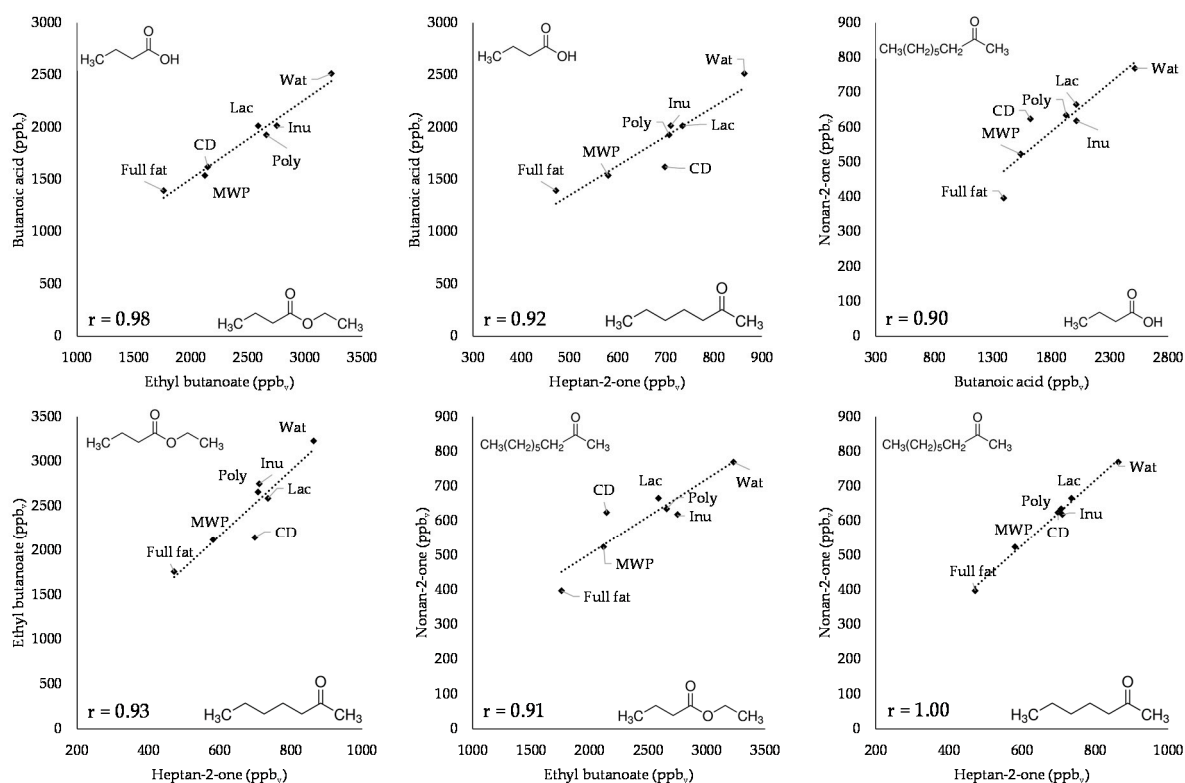

**Figure S6.** Correlations between the headspace concentration of the aroma compounds butanoic acid, ethyl butanoate, heptan-2-one, and nonan-2-one in the different emulsions ( $r$  = correlation coefficient).
